# Supplementary material for: Mobile origami immunosensors for the rapid detection of urinary tract infections
Source: Royal Society of Chemistry journal article supplement (doi:10.1039/d0an01218a), 2020-01-01
Supplement: d0an01218a1.pdf [file d0an01218a1.pdf]

# **Mobile Origami Immunosensors for the Rapid Detection of Urinary Tract Infections**

Cristina Adrover-Jaume,<sup>1,2</sup> Estrella Rojo-Molinero,<sup>3</sup> Antonio Clemente,<sup>1,\*</sup> Steven M.  
Russell,<sup>1</sup> Javier Arranz,<sup>4,5</sup> Antonio Oliver<sup>3</sup> and Roberto de la Rica.<sup>1,2,\*</sup>

<sup>1</sup> Multidisciplinary Sepsis Group, Health Research Institute of the Balearic Islands (IdISBa), Son  
Espases University Hospital, S building, Cra. de Valldemossa 79, 07120 Palma de Mallorca, Spain.

<sup>2</sup> Department of Chemistry, University of the Balearic Islands, Cra. de Valldemossa km 7.5, 07021,  
Palma de Mallorca, Spain.

<sup>3</sup> Servicio de Microbiología, Hospital Son Espases, Health Research Institute of the Balearic Islands  
(IdISBa), Palma de Mallorca, Spain

<sup>4</sup> Escola Graduada Health Center, Mallorca Primary Care Department, Balearic Health Service, Spain

<sup>5</sup> Infectious Diseases in Primary Care Group (GMISBAL), Health Research Institute of the Balearic  
Islands (IdISBa)

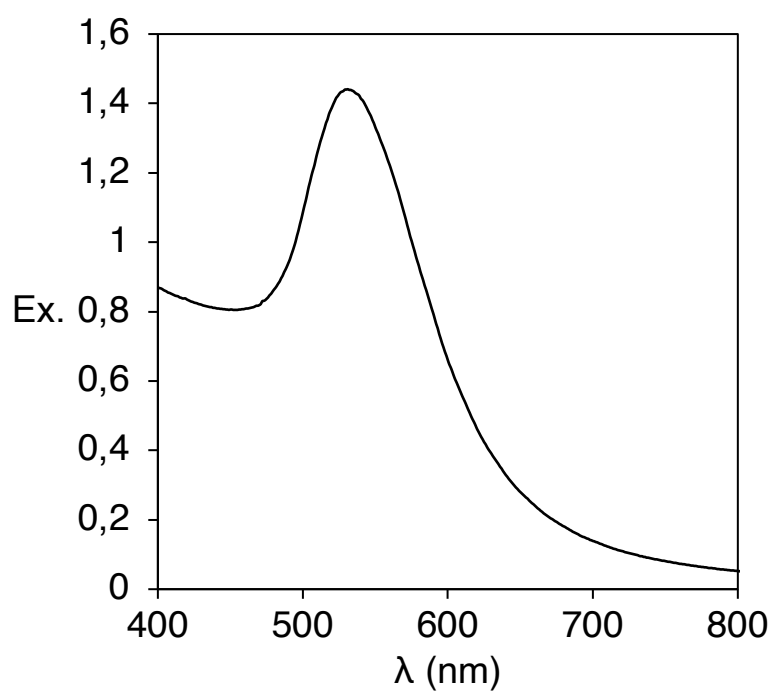

**Figure S1.** Vis-NIR spectrum of the as-synthesized gold nanoparticles.

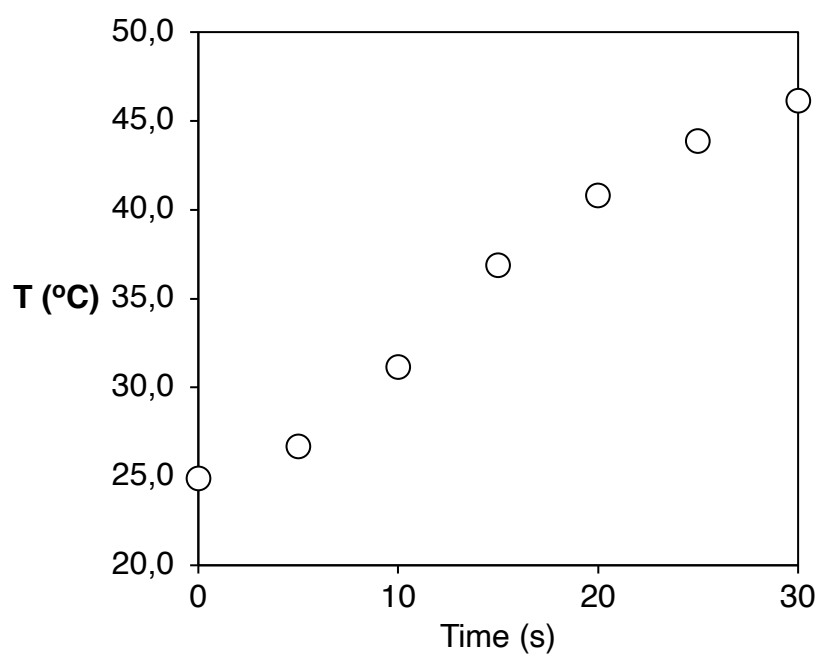

**Figure S2.** Temperature generated by the hair drier positioned 5 cm away from the biosensor. The plot was obtained by substituting the biosensor for a temperature probe.

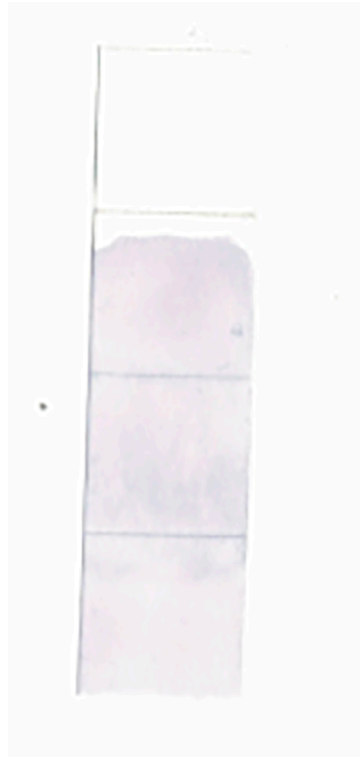

**Figure S3.** Photograph showing the effect of the wax barrier. Water-soluble ink was added to show that the hydrophobic barrier stops liquids from touching the upper part of the biosensor until this is folded and put in contact with the rest of the paper strip.

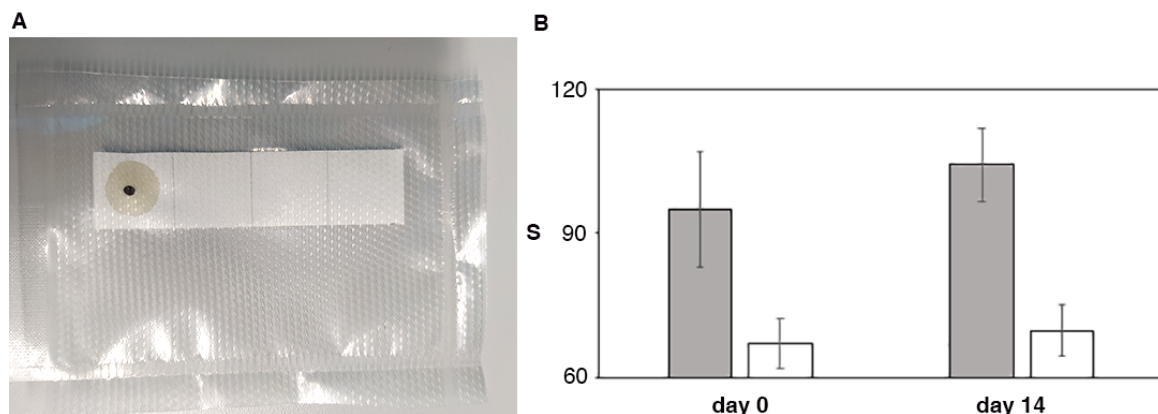

**Figure S4.** Stability over time; (A) Photograph showing origami biosensors stored in a vacuum sealed bag; (B) Colorimetric signal from samples containing  $10^8$  (grey) or 0 (white) cells/mL when the samples were measured the same day the biosensors were fabricated (day 0), or 14 days after vacuum sealing and storage at 4 degrees in a fridge. Biosensors were preserved using a FoodSaver vacuum sealer. Error bars are the standard deviation of 3 biosensors.
